# Supplementary material for: Socioeconomic Factors and Health Status Disparities Associated with Difficulty in ADLs and IADLs among Long-Lived Populations in Brazil: A Cross-Sectional Study
Source: PubMed Central journal article supplement — Inquiry. 2021 Apr 9;58:00469580211007264. doi: 10.1177/00469580211007264 (PMC8040385; doi:10.1177/00469580211007264), 2021-04-09
Supplement: sj-pdf-1-inq-10.1177_00469580211007264.pdf [file sj-pdf-1-inq-10.1177_00469580211007264.pdf]

**Supplementary Table 1.** Multiple logistic regression model for the association between difficulties for ADLs and IADLs with gender dimension for each population separately. Data was collected in Brejo dos Santos, in state of Paraíba, Brazil (SABE-PB) and in São Paulo, capital (SABE-SP) in 2017 and 2016, respectively.

| Difficulties                                         | SABE-PB      |      |     |      |          |           | SABE-SP |        |      |     |      |          |           |   |
|------------------------------------------------------|--------------|------|-----|------|----------|-----------|---------|--------|------|-----|------|----------|-----------|---|
|                                                      | Gender       |      |     |      | OR crude | CI 95%    | p       | Gender |      |     |      | OR crude | CI 95%    | p |
|                                                      | Women        |      | Men |      |          |           |         | Women  |      | Men |      |          |           |   |
|                                                      | n            | %    | n   | %    | n        | %         | n       | %      |      |     |      |          |           |   |
| <b>ADLs</b>                                          |              |      |     |      |          |           |         |        |      |     |      |          |           |   |
| <b><i>Walking</i></b>                                |              |      |     |      |          |           |         |        |      |     |      |          |           |   |
| Yes                                                  | 30           | 16.8 | 13  | 7.3  | 2.3      | 1.11-4.8  |         | 57     | 24.2 | 11  | 4.7  | 2.66     | 1.29-5.47 |   |
| No                                                   | 68           | 38   | 68  | 38   | 1.0      | 1.0       |         | 111    | 47   | 57  | 24.2 | 1.0      | 1.0       |   |
|                                                      | <b>0.023</b> |      |     |      |          |           |         |        |      |     |      |          |           |   |
| <b><i>Dressing</i></b>                               |              |      |     |      |          |           |         |        |      |     |      |          |           |   |
| Yes                                                  | 37           | 20.7 | 33  | 18.4 | 0.88     | 0.48-1.61 |         | 57     | 24.2 | 11  | 4.7  | 2.66     | 1.29-5.47 |   |
| No                                                   | 61           | 34.1 | 48  | 26.8 | 1.0      | 1.0       |         | 111    | 47   | 57  | 24.2 | 1.0      | 1.0       |   |
|                                                      | <b>0.68</b>  |      |     |      |          |           |         |        |      |     |      |          |           |   |
| <b><i>Bathing</i></b>                                |              |      |     |      |          |           |         |        |      |     |      |          |           |   |
| Yes                                                  | 35           | 19.5 | 15  | 8.4  | 2.44     | 1.22-4.90 |         | 56     | 23.7 | 12  | 5.1  | 2.4      | 1.19-4.83 |   |
| No                                                   | 63           | 35.2 | 66  | 36.9 | 1.0      | 1.0       |         | 111    | 47   | 57  | 24.2 | 1.0      | 1.0       |   |
|                                                      | <b>0.011</b> |      |     |      |          |           |         |        |      |     |      |          |           |   |
| <b><i>Personal hygiene</i></b>                       |              |      |     |      |          |           |         |        |      |     |      |          |           |   |
| Yes                                                  | 27           | 15.1 | 18  | 10   | 1.33     | 0.67-2.64 |         | 39     | 16.5 | 13  | 5.5  | 1.3      | 0.65-2.63 |   |
| No                                                   | 71           | 39.7 | 63  | 35.2 | 1.0      | 1.0       |         | 129    | 54.4 | 56  | 23.6 | 1.0      | 1.0       |   |
|                                                      | <b>0.41</b>  |      |     |      |          |           |         |        |      |     |      |          |           |   |
| <b><i>Eating</i></b>                                 |              |      |     |      |          |           |         |        |      |     |      |          |           |   |
| Yes                                                  | 14           | 7.8  | 6   | 3.3  | 2.08     | 0.76-5.7  |         | 24     | 10.1 | 4   | 1.7  | 2.71     | 0.9-8.1   |   |
| No                                                   | 84           | 46.9 | 75  | 41.9 | 1.0      | 1.0       |         | 144    | 60.8 | 65  | 27.4 | 1.0      | 1.0       |   |
|                                                      | <b>0.14</b>  |      |     |      |          |           |         |        |      |     |      |          |           |   |
| <b><i>Lie down and get out of bad and chairs</i></b> |              |      |     |      |          |           |         |        |      |     |      |          |           |   |
| Yes                                                  | 31           | 18.6 | 10  | 6    | 3.2      | 1.45-7.08 |         | 64     | 27.1 | 12  | 5.1  | 2.95     | 1.47-5.92 |   |
| No                                                   | 62           | 37.1 | 64  | 38.3 | 1.0      | 1.0       |         | 103    | 43.6 | 57  | 24.2 | 1.0      | 1.0       |   |
|                                                      | <b>0.003</b> |      |     |      |          |           |         |        |      |     |      |          |           |   |
| <b><i>Toilet hygiene</i></b>                         |              |      |     |      |          |           |         |        |      |     |      |          |           |   |
| Yes                                                  | 28           | 16.1 | 11  | 6.3  | 2.51     | 1.16-5.44 |         | 58     | 24.5 | 11  | 4.6  | 2.78     | 1.35-5.7  |   |
| No                                                   | 68           | 39.1 | 67  | 38.5 | 1.0      | 1.0       |         | 110    | 46.4 | 58  | 24.5 | 1.0      | 1.0       |   |
|                                                      | <b>0.018</b> |      |     |      |          |           |         |        |      |     |      |          |           |   |
| <b>IADLs</b>                                         |              |      |     |      |          |           |         |        |      |     |      |          |           |   |
| <b><i>Hot meal preparation</i></b>                   |              |      |     |      |          |           |         |        |      |     |      |          |           |   |
|                                                      | <b>0.09</b>  |      |     |      |          |           |         |        |      |     |      |          |           |   |
|                                                      | <b>0.04</b>  |      |     |      |          |           |         |        |      |     |      |          |           |   |

|                                    |    |      |    |      |      |           |     |      |    |      |      |             |              |
|------------------------------------|----|------|----|------|------|-----------|-----|------|----|------|------|-------------|--------------|
| Yes                                | 26 | 14.5 | 13 | 7.3  | 1.89 | 0.9-3.97  | 48  | 20.3 | 11 | 4.7  | 2.13 | 1.03-4.4    |              |
| No/Don't usually do                | 72 | 40.2 | 68 | 38   | 1.0  | 1.0       | 119 | 50.4 | 58 | 24.6 | 1.0  | 1.0         |              |
| <b><i>Own money management</i></b> |    |      |    |      |      |           |     |      |    |      |      | <b>0.42</b> | <b>0.001</b> |
| Yes                                | 42 | 23.5 | 30 | 16.8 | 1.27 | 0.69-2.33 | 55  | 23.2 | 8  | 3.4  | 3.71 | 1.66-8.3    |              |
| No/Don't usually do                | 56 | 31.3 | 51 | 28.5 | 1.0  | 1.0       | 113 | 47.7 | 61 | 25.7 | 1.0  | 1.0         |              |
| <b><i>Use transport</i></b>        |    |      |    |      |      |           |     |      |    |      |      | <b>0.04</b> | <b>0.001</b> |
| Yes                                | 38 | 21.2 | 20 | 11.2 | 1.93 | 1.01-3.69 | 76  | 32.3 | 15 | 6.4  | 3.04 | 1.59-5.81   |              |
| No/Don't usually do                | 60 | 33.5 | 61 | 34.1 | 1.0  | 1.0       | 90  | 38.3 | 54 | 22.9 | 1.0  | 1.0         |              |
| <b><i>Shopping</i></b>             |    |      |    |      |      |           |     |      |    |      |      | <b>0.01</b> | <b>0.01</b>  |
| Yes                                | 41 | 22.9 | 20 | 11.2 | 2.19 | 1.15-4.18 | 63  | 26.7 | 15 | 6.4  | 2.18 | 1.14-4.19   |              |
| No/Don't usually do                | 57 | 31.8 | 61 | 34.1 | 1.0  | 1.0       | 104 | 44.1 | 54 | 22.9 | 1.0  | 1.0         |              |
| <b><i>Phoning</i></b>              |    |      |    |      |      |           |     |      |    |      |      | <b>0.61</b> | <b>0.17</b>  |
| Yes                                | 13 | 7.3  | 13 | 7.3  | 0.81 | 0.35-1.86 | 48  | 20.4 | 14 | 6    | 1.6  | 0.81-3.14   |              |
| No/Don't usually do                | 84 | 47.2 | 68 | 38.2 | 1.0  | 1.0       | 118 | 50.2 | 55 | 23.4 | 1.0  | 1.0         |              |
| <b><i>Ligth housework</i></b>      |    |      |    |      |      |           |     |      |    |      |      | <b>0.05</b> | <b>0.05</b>  |
| Yes                                | 36 | 20.2 | 19 | 10.7 | 1.93 | 0.99-3.72 | 47  | 20   | 11 | 4.7  | 2.03 | 0.98-4.2    |              |
| No/Don't usually do                | 61 | 34.3 | 62 | 34.8 | 1.0  | 1.0       | 120 | 51.1 | 57 | 24.3 | 1.0  | 1.0         |              |
| <b><i>Taking medicines</i></b>     |    |      |    |      |      |           |     |      |    |      |      | <b>0.06</b> | <b>0.05</b>  |
| Yes                                | 41 | 22.9 | 23 | 12.8 | 1.81 | 0.97-3.4  | 66  | 27.8 | 18 | 7.6  | 1.83 | 0.99-3.41   |              |
| No/Don't take medicine             | 57 | 31.8 | 58 | 32.4 | 1.0  | 1.0       | 102 | 43   | 51 | 21.5 | 1.0  | 1.0         |              |

\* p <0.05. SABE: Health, well-being and aging; ORadj: adjusted odds ratio; 95% CI: 95% confidence interval. ADLs: activities of daily living; IADLs: instrumental activities of daily living.
